# Supplementary material
Source: HighWire-hosted journal article supplement (https://gh.bmj.com/content/6/5/e004475)
Supplement: inline-supplementary-material-1 [file inline-supplementary-material-1.pdf]

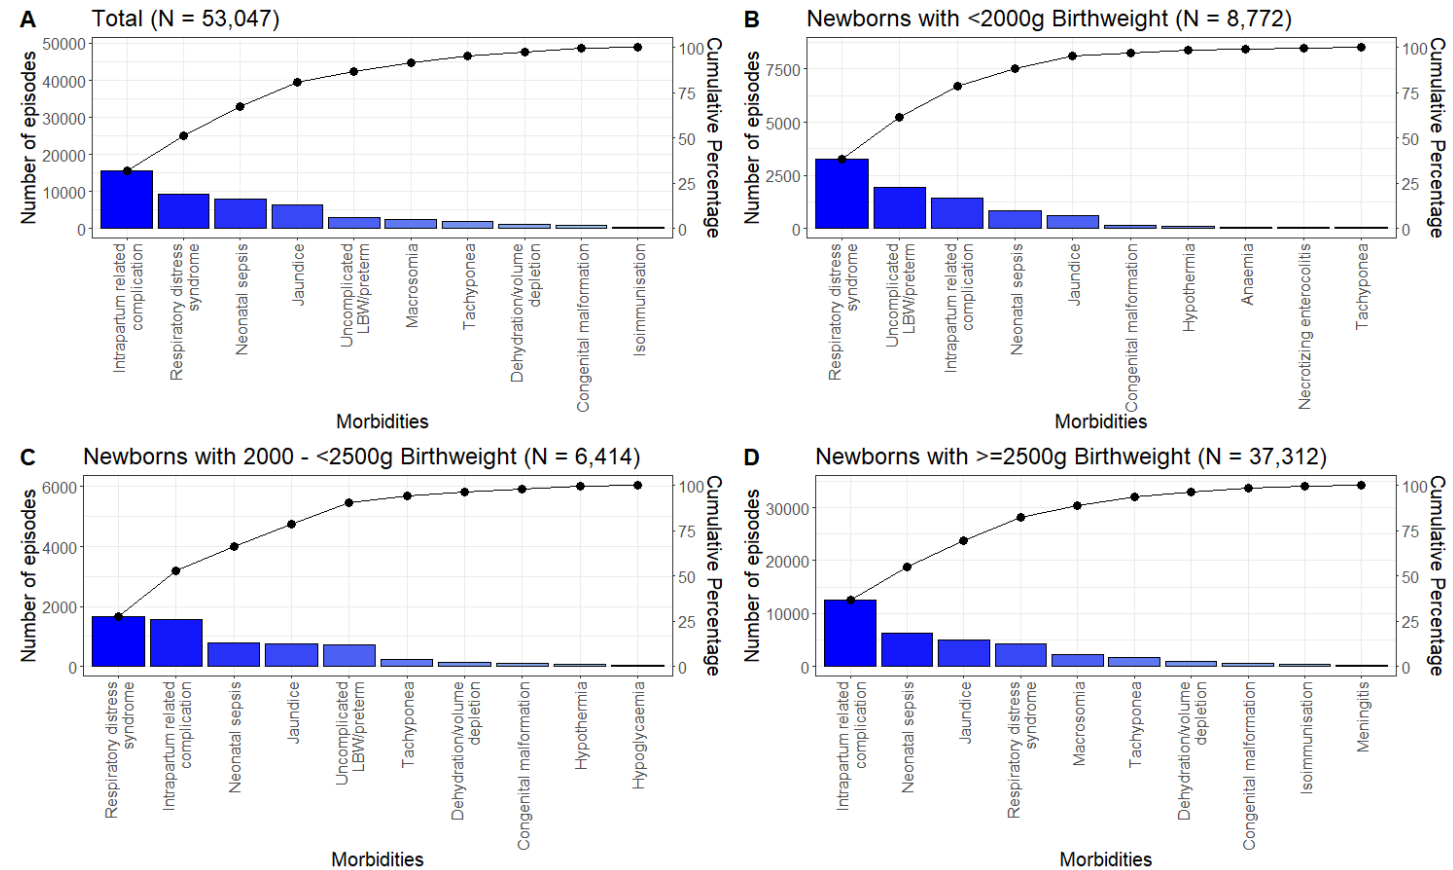

**Figure S1** : Prevalence of morbidity episodes among the inborn neonates (Population B) stratified by birthweight in all the 16 NBUs

- Clinical diagnosis as recorded by the clinician without necessarily supported by laboratory or radiological investigation
- Disease episodes – each diagnosis is counted as an episode, thus patient comorbidities had more than one disease episode.
- Uncomplicated LBW/prematurity was entered as an admission diagnosis if there was no other comorbidity recorded,
- 'Intrapartum related complications' includes clinical diagnosis of birth asphyxia, hypoxic ischaemic encephalopathy and meconium aspiration
