# Supplementary material
Source: HighWire-hosted journal article supplement (https://gh.bmj.com/content/6/5/e004475)
Supplement: inline-supplementary-material-3 [file inline-supplementary-material-3.pdf]

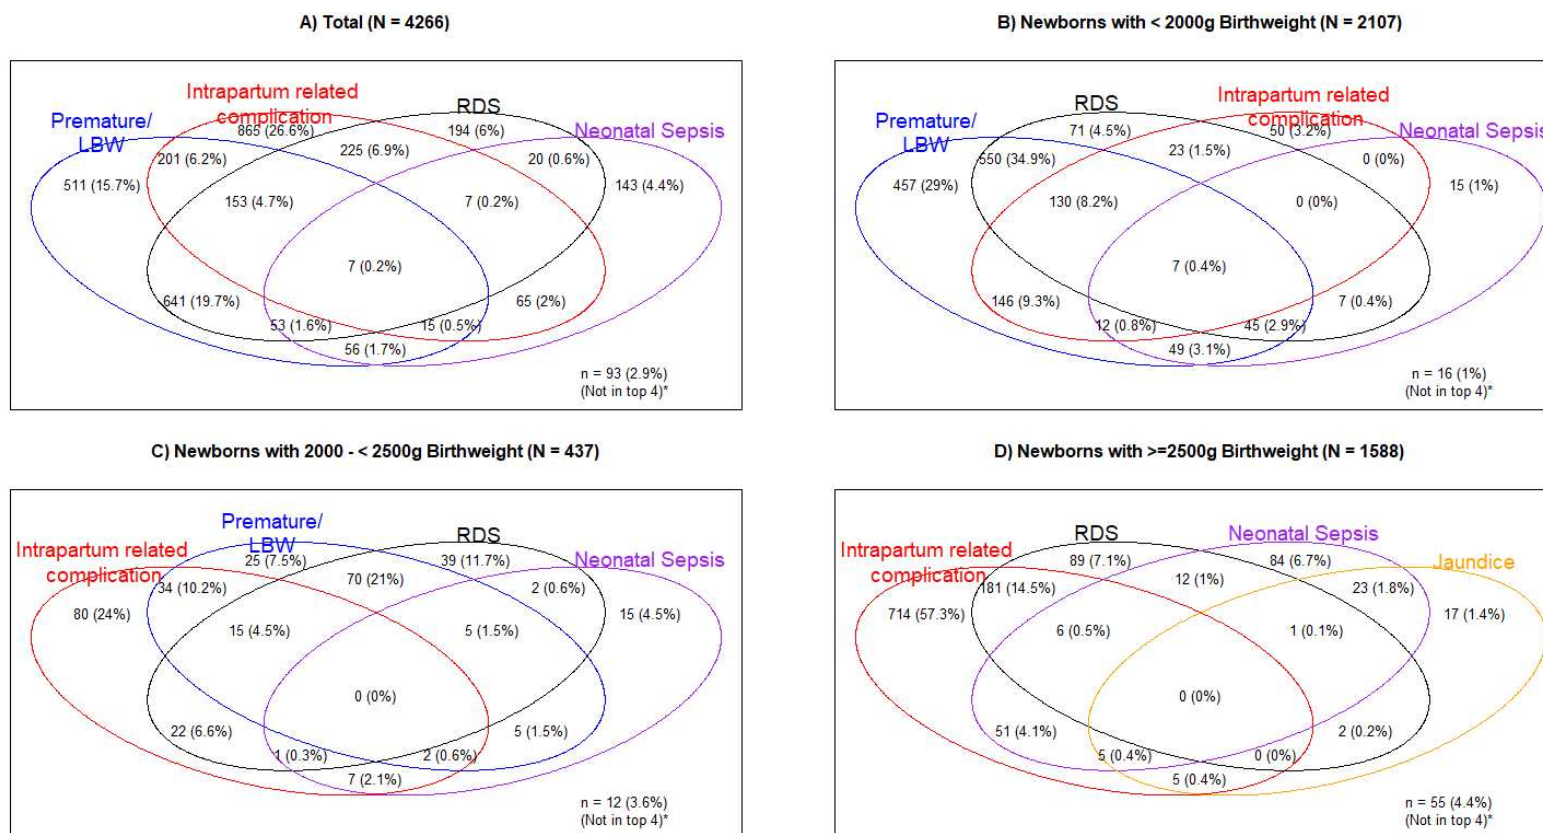

**Figure S2:** Four leading causes of deaths among the inborn neonates in the 16 NBUs (Population B). **A** - causes of death among all the 4266 inborns who died during the study period, **B, C & D** - causes of deaths among inborn neonates with birthweight <2000grams, 2000to <2500 grams and  $\geq 2500$ grams respectively.

\*disease episodes, associated with neonates who died, that were none of the four leading diagnoses as either a primary or comorbid condition.

Abbreviations: LBW- Low birth weight, RDS- Respiratory distress syndrome
