# Supplementary material
Source: HighWire-hosted journal article supplement (https://gh.bmj.com/content/6/5/e004475)
Supplement: inline-supplementary-material-4 [file inline-supplementary-material-4.pdf]

**Table S2:** Mortality prevalence by birthweight category among the inborn neonates in the NBUs of the 16 CIN hospitals (Population B)

|              | <b>&lt; 1 Kg</b>     | <b>1 - &lt; 1.5 Kg</b> | <b>1.5 - &lt; 2 Kg</b> | <b>2 - &lt; 2.5 Kg</b> | <b>2.5 - 4 Kg</b>      | <b>&gt; 4 Kg</b>    | <b>Total</b>            |
|--------------|----------------------|------------------------|------------------------|------------------------|------------------------|---------------------|-------------------------|
| H1           | 85% (11/13)          | 58% (25/43)            | 24% (34/142)           | 13% (18/138)           | 12% (16/568)           | 14% (8/57)          | <b>17% (165/961)</b>    |
| H2           | 71% (12/17)          | 34% (30/87)            | 17% (21/123)           | 17% (13/75)            | 10% (46/468)           | 8% (3/37)           | <b>15% (125/807)</b>    |
| H3           | 95% (39/41)          | 47% (51/108)           | 19% (39/204)           | 12% (36/306)           | 6% (139/2340)          | 5% (5/110)          | <b>10% (309/3109)</b>   |
| H4           | 81% (25/31)          | 41% (33/80)            | 11% (14/132)           | 6% (7/119)             | 9% (38/440)            | 6% (2/35)           | <b>14% (119/837)</b>    |
| H5           | 87% (45/52)          | 50% (93/187)           | 18% (60/337)           | 8% (27/323)            | 12% (151/1275)         | 3% (9/297)          | <b>16% (385/2471)</b>   |
| H6           | 79% (30/38)          | 40% (31/78)            | 11% (19/178)           | 10% (25/249)           | 5% (67/1312)           | 3% (3/86)           | <b>9% (175/1941)</b>    |
| H7           | 84% (52/62)          | 60% (100/168)          | 19% (65/335)           | 11% (48/442)           | 6% (132/2329)          | 2% (5/232)          | <b>11% (402/3568)</b>   |
| H8           | 71% (15/21)          | 38% (19/50)            | 15% (16/108)           | 5% (6/131)             | 6% (35/593)            | 0% (0/52)           | <b>10% (91/955)</b>     |
| H9           | 79% (31/39)          | 36% (47/130)           | 22% (51/236)           | 14% (22/162)           | 12% (97/777)           | 6% (3/47)           | <b>18% (251/1391)</b>   |
| H10          | 53% (41/77)          | 32% (58/181)           | 7% (27/390)            | 5% (29/551)            | 3% (106/3616)          | 3% (7/258)          | <b>5% (286/5073)</b>    |
| H11          | 87% (85/98)          | 49% (143/293)          | 14% (80/566)           | 9% (45/512)            | 7% (164/2240)          | 1% (5/461)          | <b>13% (522/4170)</b>   |
| H12          | 67% (44/66)          | 32% (55/174)           | 12% (37/306)           | 10% (25/241)           | 10% (95/905)           | 0% (0/55)           | <b>15% (256/1747)</b>   |
| H13          | 80% (28/35)          | 38% (36/94)            | 12% (24/206)           | 5% (15/275)            | 5% (63/1351)           | 0% (1/219)          | <b>8% (167/2180)</b>    |
| H14          | 86% (6/7)            | 50% (20/40)            | 11% (12/109)           | 13% (11/84)            | 8% (30/380)            | 0% (0/21)           | <b>12% (79/641)</b>     |
| H15          | 86% (31/36)          | 44% (45/103)           | 16% (260/41)           | 10% (37/389)           | 4% (73/1849)           | 1% (2/296)          | <b>8% (229/2933)</b>    |
| H16          | 81% (73/90)          | 42% (125/297)          | 12% (88/730)           | 7% (73/1007)           | 4% (223/5898)          | 2% (7/360)          | <b>7% (589/8382)</b>    |
| <b>Total</b> | <b>79% (568/723)</b> | <b>43% (911/2113)</b>  | <b>14% (628/4362)</b>  | <b>9% (437/5004)</b>   | <b>6% (1528/26341)</b> | <b>2% (60/2623)</b> | <b>10% (4132/41166)</b> |
