# Supplementary material
Source: HighWire-hosted journal article supplement (https://gh.bmj.com/content/6/5/e004475)
Supplement: inline-supplementary-material-5 [file inline-supplementary-material-5.pdf]

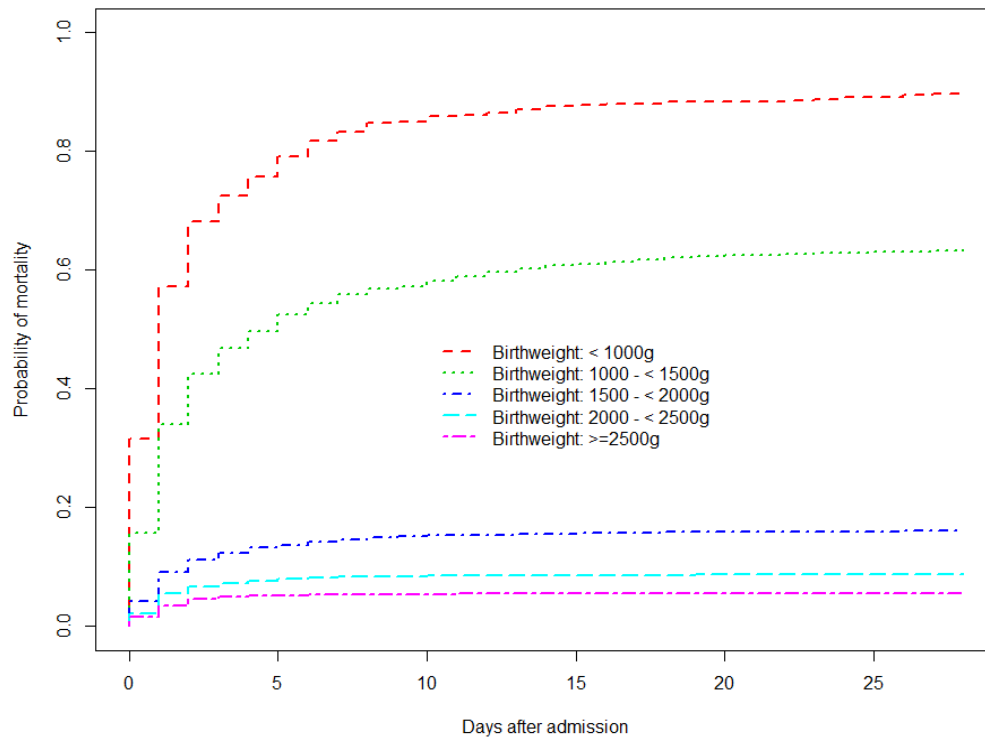

**Figure S3: Probability of mortality of the inborn neonates (Population B) by length of stay during 4 weeks of admission in the NBU of 16 hospital in the CIN**
